# Supplementary material for: Synthesis, cytotoxicities, structural properties and comparison of dihalogeno-substituted-thiosemicarbazone ligands and mixed-ligand Ni(ii) complexes
Source: Royal Society of Chemistry journal article supplement (doi:10.1039/d4dt02774d), 2024-11-18
Supplement: d4dt02774d1.pdf [file d4dt02774d1.pdf]

## Supporting material

### Synthesis, Cytotoxicities, Structural Properties and Comparison of Dihalogenosubstituted-thiosemicarbazone ligands and Mixed-Ligand Ni(II) Complexes

Elif AVCU ALTIPARMAK<sup>1</sup>, Güneş ÖZEN EROĞLU<sup>2</sup>, Namık ÖZDEMİR<sup>3</sup>, Serap ERDEM KURUCA<sup>4,5</sup>,  
Tülay BAL DEMİRCİ<sup>1,\*</sup>

<sup>1</sup> Department of Chemistry, Engineering Faculty, Inorganic Chemistry Department, Istanbul University-Cerrahpasa, 34320, Istanbul, Turkiye

<sup>2</sup> Department of Molecular Medicine, Aziz Sancar Institute of Experimental Medicine, Istanbul University, 34093, Istanbul, Turkiye

<sup>3</sup> Department of Physic, Faculty of Art and Science, Ondokuz Mayıs University, 55139, Samsun, Turkiye

<sup>4</sup> Department of Physiology, Faculty of Medicine, Istanbul University, 34390, Istanbul, Turkiye

<sup>5</sup> Department of Physiology, Faculty of Medicine, Istanbul Atlas University, 34408, Istanbul, Turkiye

\* Corresponding author: Tülay BAL DEMİRCİ [tulaybal@iuc.edu.tr](mailto:tulaybal@iuc.edu.tr)

#### Orcid ID

Elif AVCU ALTIPARMAK 0000-0002-5491-8445

Güneş ÖZEN EROĞLU 0000-0003-3681-9336

Tülay BAL-DEMİRCİ 0000-0003-4663-2209

Namık ÖZDEMİR 0000-0003-3371-9874

Serap ERDEM KURUCA 0000-0001-7878-9994

## Supplementary Materials

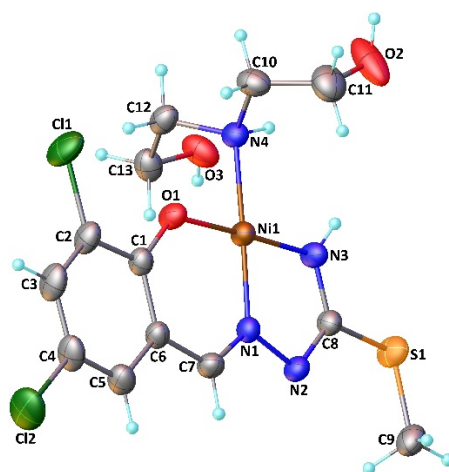

**Fig. S1** Molecular structure of **Complex I** with the atom numbering. Thermal ellipsoids are shown at the 30% probability level

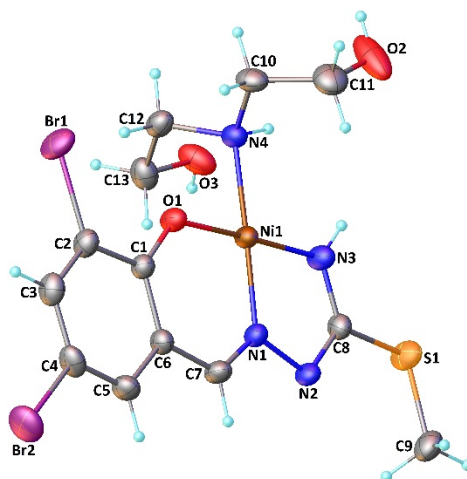

**Fig. S2** Molecular structure of **Complex II** with the atom numbering. Thermal ellipsoids are shown at the 30% probability level

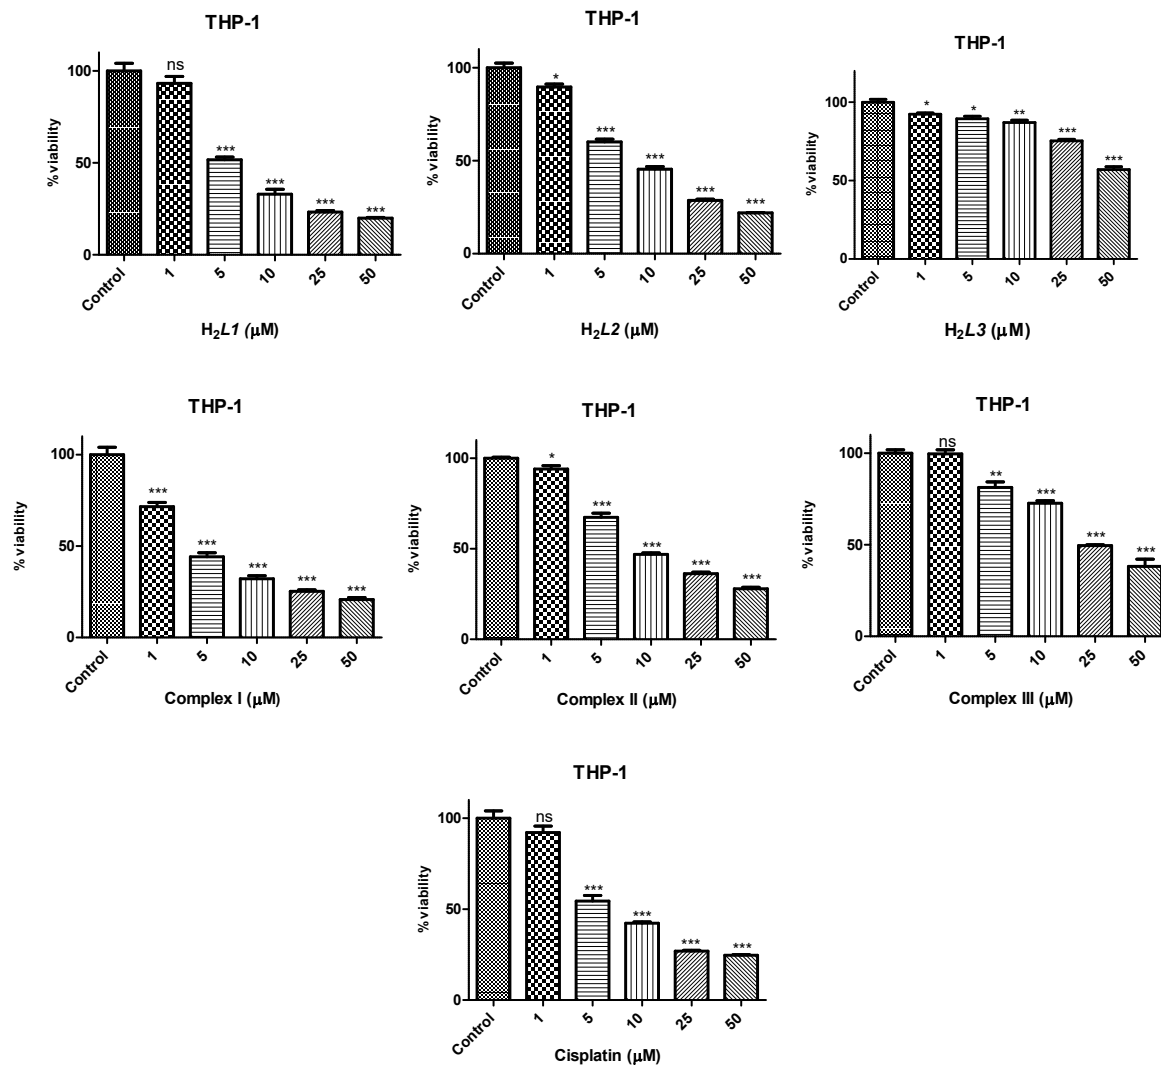

**Fig. S3** The graphs showing the cell viability obtained by MTT assay in THP-1 human acute monocytic leukemia cell line treated with different concentrations **H<sub>2</sub>L1**, **H<sub>2</sub>L2**, **H<sub>2</sub>L3**, **Complex I**, **Complex II**, **Complex III** and **Cisplatin**. \*\*\* $p < 0.001$ , \*\* $p < 0.01$ , \* $p < 0.05$ , significant differences between control and each treatment group. The results represent the means of at least 3 independent experiments

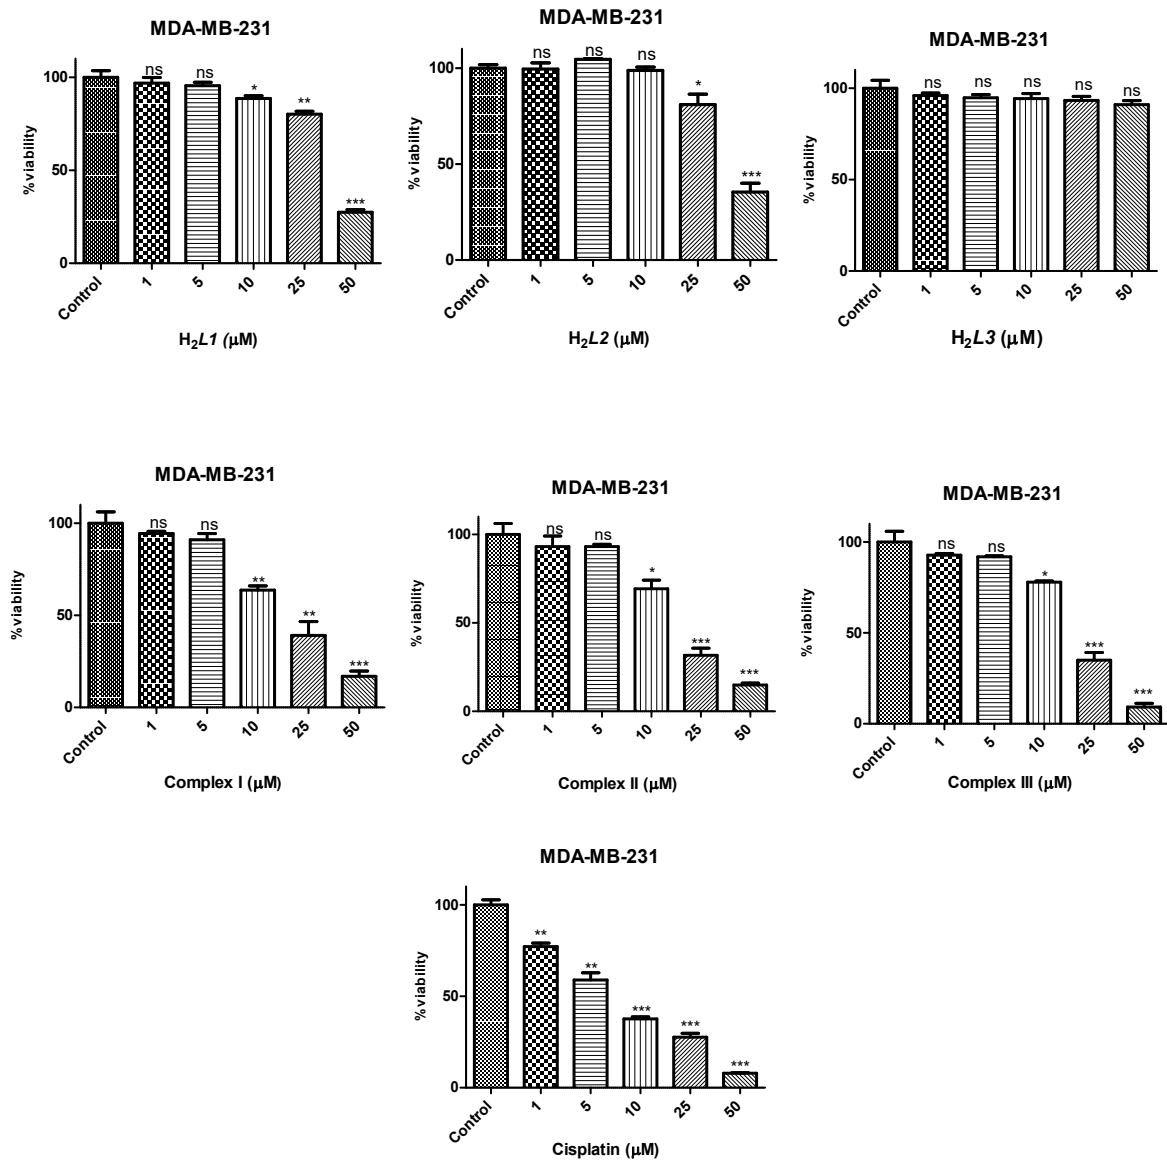

**Fig. S4** The graphs showing the cell viability obtained by MTT assay in MDA-MB-231 human breast cancer cell line treated with different concentrations **H<sub>2</sub>L1**, **H<sub>2</sub>L2**, **H<sub>2</sub>L3**, **Complex I**, **Complex II**, **Complex III** and **Cisplatin**. \*\*\*p < 0.001, \*\*p < 0.01, \*p < 0.05, significant differences between control and each treatment group, ns: not significant. The results represent the means of at least 3 independent experiments

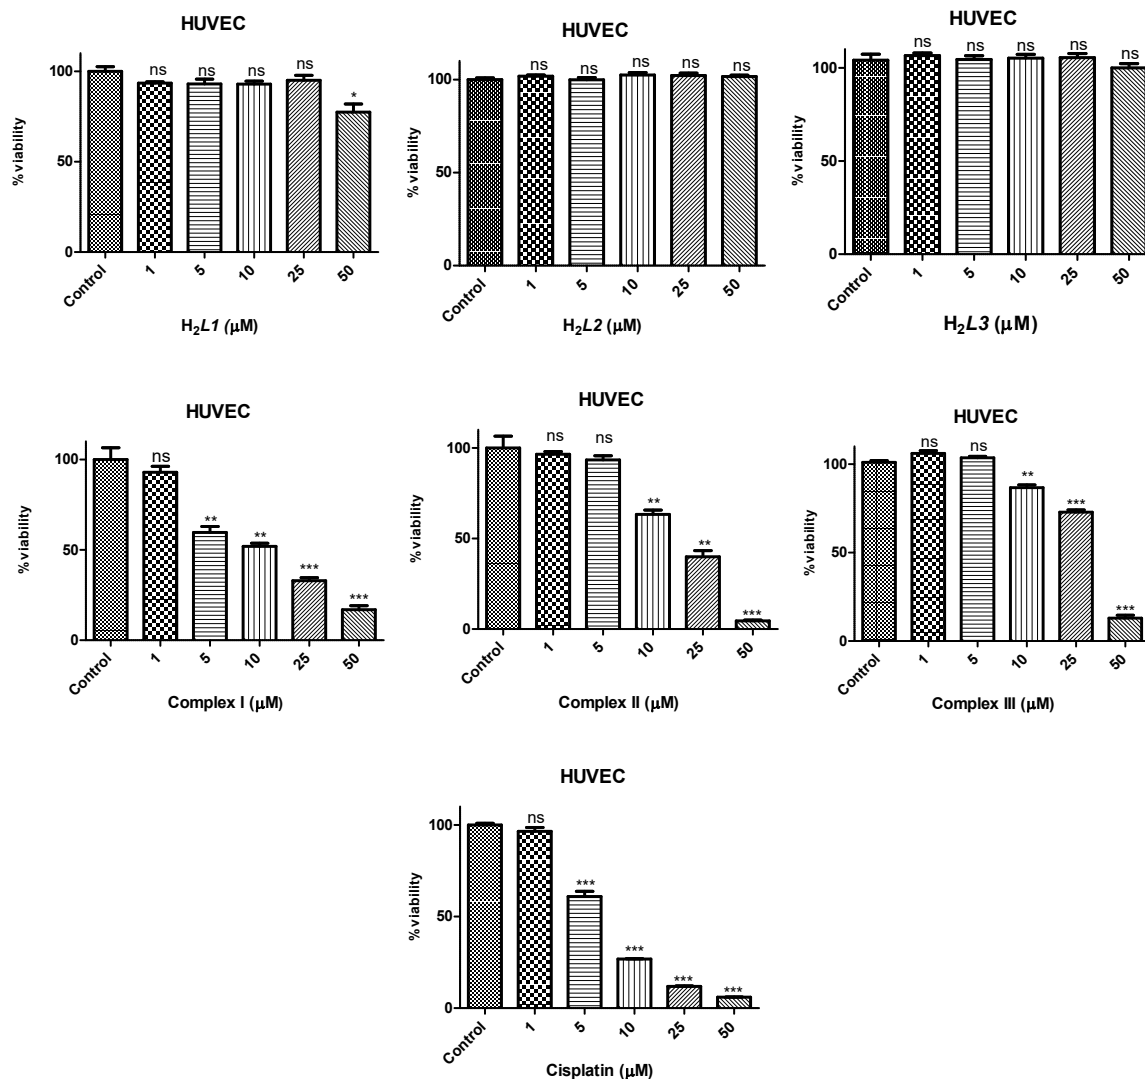

**Fig. S5** The graphs showing the cell viability obtained by MTT assay in Human umbilical vein endothelial cells (HUVEC) cell line treated with different concentrations **H<sub>2</sub>L1**, **H<sub>2</sub>L2**, **H<sub>2</sub>L3**, **Complex I**, **Complex II**, **Complex III** and **Cisplatin**. \*\*\*p < 0.001, \*\*p < 0.01, \*p < 0.05, significant differences between control and each treatment group. The results represent the means of at least 3 independent experiments

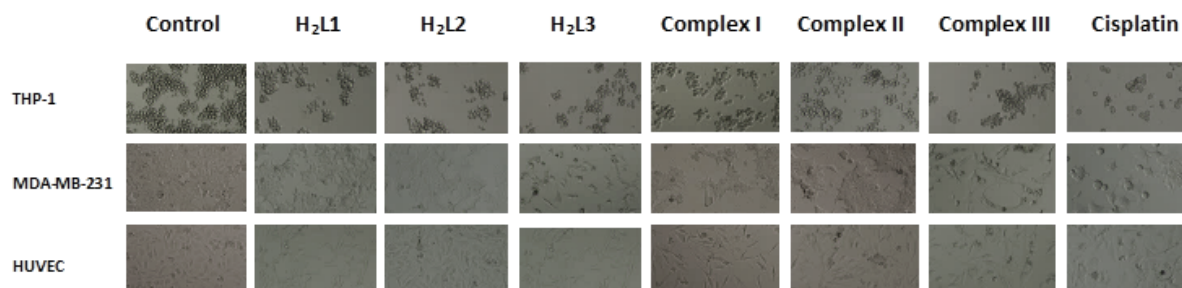

**Fig. S6** Representative microscopic images (20X) of all cell lines treated with **H<sub>2</sub>L1**, **H<sub>2</sub>L2**, **H<sub>2</sub>L3**, **Complex I**, **Complex II**, **Complex III**, and **Cisplatin** at their IC<sub>50</sub> concentrations for 72 hours.

## Stability Tests of the Active Compounds

### Stabilities of the Substances in PBS

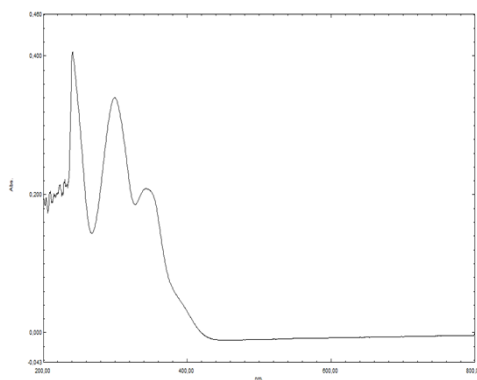

**Fig. S7** UV-Vis Spectrum of the **H<sub>2</sub>L1** in PBS. (%2 DMF, 40  $\mu$ M)

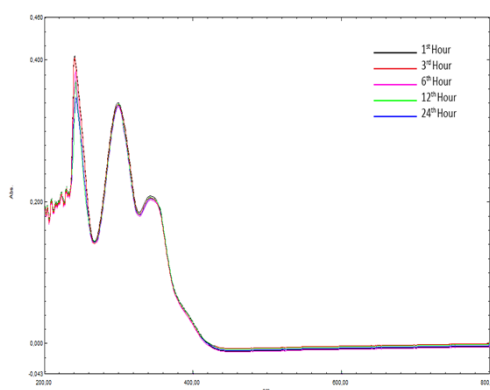

**Fig. S8** Time-dependent stability of the **H<sub>2</sub>L1** in PBS. (%2 DMF, 40  $\mu$ M)

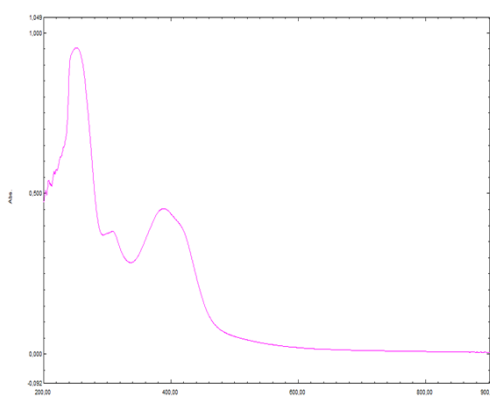

**Fig. S9** UV-Vis Spectrum of the **Complex I** in PBS. (%2 DMF, 40  $\mu$ M)

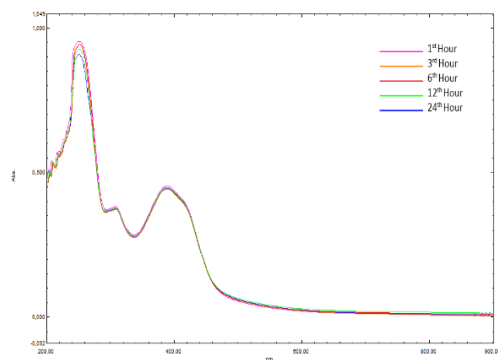

**Fig. S10** Time-dependent stability of the Complex I in PBS. (%2 DMF, 40  $\mu$ M)

### Stabilities of the Substances in DMSO

The stabilities of biologically active substances in DMSO was measured in a time-dependent manner (0, 1, 3, 6, 12 and 24 h).

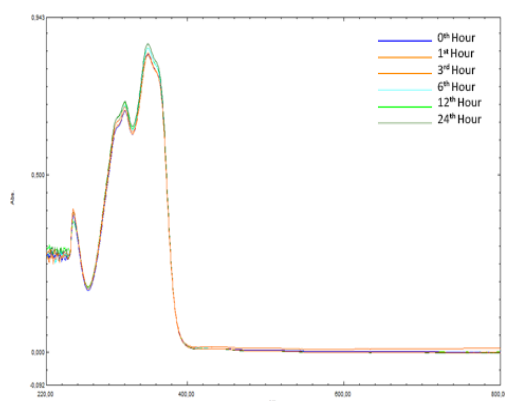

**Fig. S11** Time-dependent stability of the **H<sub>2</sub>L1** in DMSO.

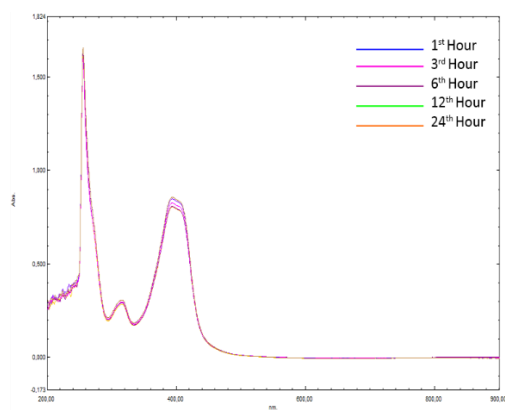

**Fig. S12** Time-dependent stability of the **Complex I** in DMSO.

## Stability of Substances Against pH Changes

The stability of the compounds against pH changes was examined in DMSO. (pH= 7.0, 7.2, 7.4, 7.6, 7.8)

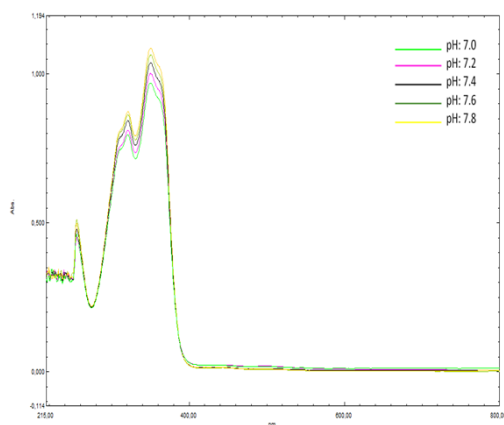

**Fig. S13** pH stability of the H<sub>2</sub>L1 in DMSO.

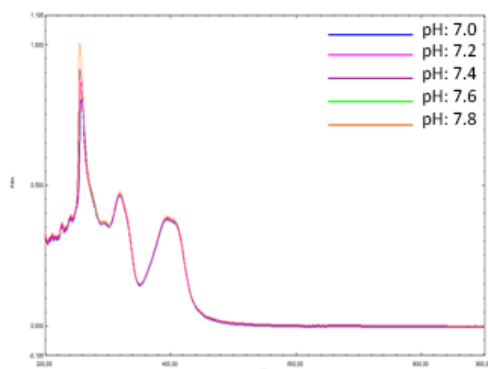

**Fig. S14** pH stability of the **Complex I** in DMSO.
